# Supplementary figures and images for: Justified Suspicion: Symptomatic Syphilitic Alopecia in a Patient with Well-Controlled HIV
Source: Hindawi journal article supplement (doi:10.1155/2021/1124033), 2021-11-15

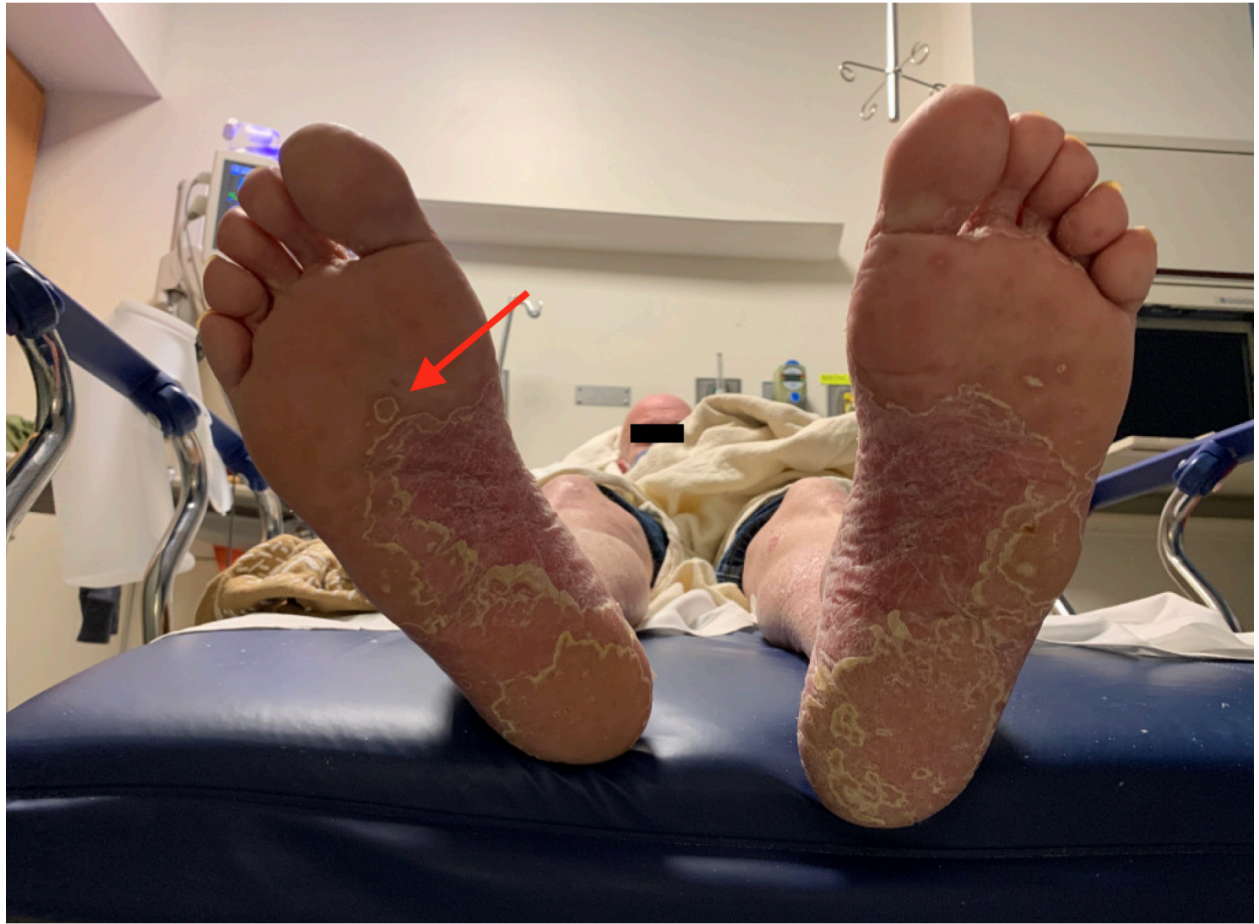

Supplement: f1 [file 1124033.f1.zip]

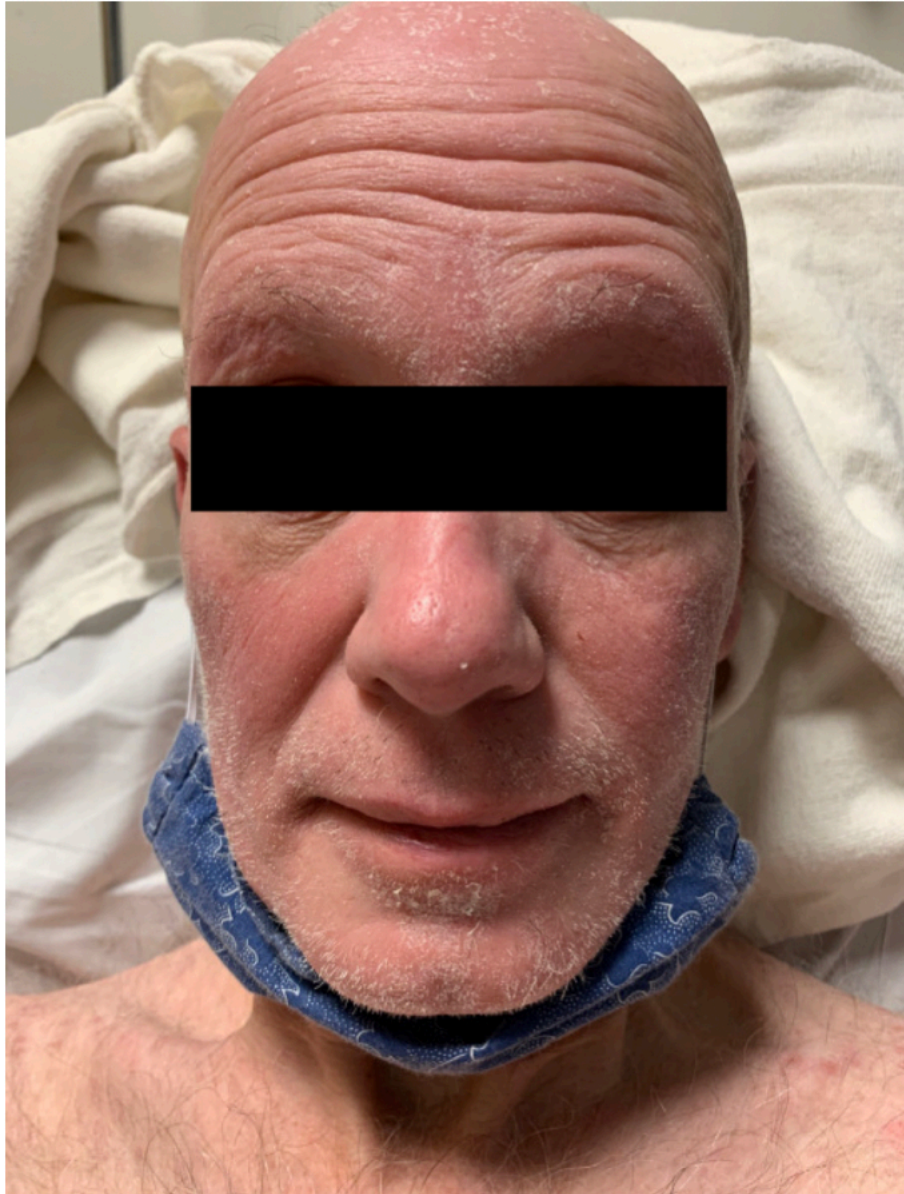

Supplement: f1 [file 1124033.f1.zip]

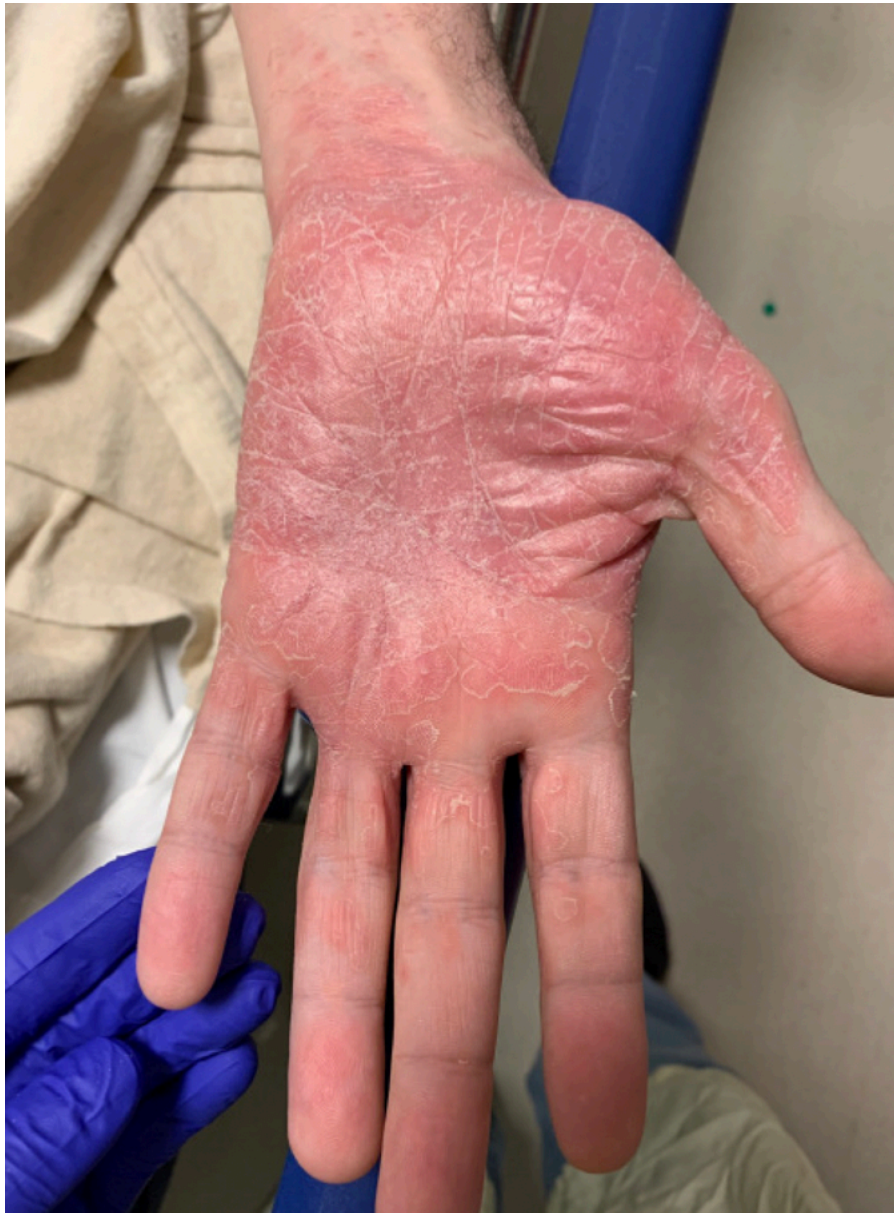

Supplement: f1 [file 1124033.f1.zip]
